# Supplementary material for: Selective catalytic oxidation of methanol on Pt-modified Cu/SSZ-13 zeolites: A strategy to change the catalytic performance by impregnation sequential
Source: Research Square preprint supplement (doi:10.21203/rs.3.rs-6991891/v1), 2025-07-11
Supplement: Supplementary file 1 [file 51433abb30d809eb91db7325.docx]

**Selective catalytic oxidation of methanol on Pt-modified Cu/SSZ-13 zeolites: A strategy to change the catalytic performance by impregnation sequential**

Qingliang Zenga, Zhitao Hana*, Tingjun Liua, Shoujun Zhangb*, Shaoqin Shengc, Liangzheng Lina, Junhao Jinga, Sihan Yina.

1. Marine Engineering College, Dalian Maritime University, Dalian 116026, China;
2. School of Electronic and Information Technology, Guangdong Ocean University, Zhanjiang 524088, China;
3. Guangzhou Shipyard International Company Ltd, Guangzhou 511462, China;

Correspondence information: Zhitao Han, Dalian Maritime University, No.1, Linghai Road, Dalian 116026, China, [hanzt@dlmu.edu.cn](mailto:hanzt@dlmu.edu.cn), ORCID: 0000-0001-5501-6067, Tel: +86 138 9869 2035. Shoujun Zhang, Guangdong Ocean University, Zhanjiang 524088, China, zhangshoujun@gdou.edu.cn, Tel: +86 189 2760 8803.

**Contents**

[**Catalyst preparation** 3](#_Toc200461809)

[**Catalyst activity test** 5](#_Toc200461810)

[**Characterization methods** 7](#_Toc200461811)

[Fig. S1. 10](#_Toc200461812)

[Fig. S2. 12](#_Toc200461813)

[Fig. S3. 13](#_Toc200461814)

# **Catalyst preparation**

(1) Cu/SSZ-13 and Pt/SSZ-13 catalysts were prepared by impregnation:

Firstly, 0.15g of Cu(NO3)2·3H2O / 0.075g of Pt(NO3)2 was dissolved in deionized water. Then 1.5 g of H-SSZ-13 powder was impregnated in the solution with strong stirring for 0.5 h. The mixture was dispersed in an ultrasonic shaker for 0.5 h. Next, the mixture continued to be stirred sufficiently at 80 ºC in a water bath to evaporate the solvent. The solid was dried at 100 ºC for 12 h, and calcined at 550 ºC for 6 h in air, and finally grounded into a fine power. The prepared catalyst was denoted as Cu/SSZ-13 / Pt/SSZ-13.

(2) Pt-Cu/SSZ-13, Pd-Cu/SSZ-13, Ru-Cu/SSZ-13, Ag-Cu/SSZ-13 catalysts were prepared by co-impregnation:

Firstly, 0.075g of Pt(NO3)2 / 0.0916g of Pd(NO3)2 / 0.0916g of RuCl3(NO3)2·3H2O / 0.0118g of AgNO3 and 0.15g of Cu(NO3)2·3H2O were dissolved in deionized water. Then 1.5 g of H-SSZ-13 powder was impregnated in the solution with strong stirring for 0.5 h. The mixture was dispersed in an ultrasonic shaker for 0.5 h. Next, the mixture continued to be stirred sufficiently at 80 ºC in a water bath to evaporate the solvent. The solid was dried at 100 ºC for 12 h, and calcined at 550 ºC for 6 h in air, and finally grounded into a fine power. The prepared catalysts were denoted as Pt-Cu/SSZ-13 / Pd-Cu/SSZ-13 / Ru-Cu/SSZ-13 / Ag-Cu/SSZ-13.

(3) Pt/Cu/SSZ-13 and Cu/Pt/SSZ-13 catalysts were prepared by distribution impregnation:

Firstly, 0.075g of Pt(NO3)2 / 0.15g of Cu(NO3)2·3H2O was dissolved in deionized water. Then 1.5 g of Cu/SSZ-13 / Pt/SSZ-13 powder was impregnated in the solution with strong stirring for 0.5 h. The mixture was dispersed in an ultrasonic shaker for 0.5 h. Next, the mixture continued to be stirred sufficiently at 80 ºC in a water bath to evaporate the solvent. The solid was dried at 100 ºC for 12 h, and calcined at 550 ºC for 6 h in air, and finally grounded into a fine power. The prepared catalysts were denoted as Pt/Cu/SSZ-13 / Cu/Pt/SSZ-13.

# **Catalyst activity test**

The SCO activity tests of these prepared catalysts were carried out in a fixed-bed quartz reactor (I.D. 6 mm) at atmospheric pressure with a catalyst dosage of 0.2 mL (40 ~ 60 meshes). All the tests were operated in a temperature range of 150 ~ 450 ºC. The simulated gas consisted of 500 ppm CH3OH, 5 vol.% O2, 100 ppm SO2 (when used), 5 vol.% H2O (when used) and N2 as balance gas with a total flow rate of 200 mL/min. The corresponding gas hourly space velocity (GHSV) was 60,000 h-1. The outlet concentrations of CH3OH, HCHO, CO were monitored by an FTIR spectrometer (Antaris IGS, ThermoFisher Scientific) equipped with a heated low-volume multiple-path gas cell (2 m) and an MCT detector cooled by liquid nitrogen. CH3OH conversion efficiency and reaction product yield were calculated as follows:

The SCR + SCO activity tests of these prepared catalysts were carried out in a fixed-bed quartz reactor (I.D. 6 mm) at atmospheric pressure with a catalyst dosage of 0.2 mL (40 ~ 60 meshes). All the tests were operated in a temperature range of 150 ~ 450 ºC. The simulated gas consisted of 500 ppm NO, 500 ppm NH3, 500 ppm CH3OH, 5 vol.% O2, and N2 as balance gas with a total flow rate of 200 mL/min. The corresponding gas hourly space velocity (GHSV) was 60,000 h-1. The outlet concentrations of CH3OH, HCHO, CO, NO, NO2, NH3 and N2O were monitored by an FTIR spectrometer (Antaris IGS, ThermoFisher Scientific) equipped with a heated low-volume multiple-path gas cell (2 m) and an MCT detector cooled by liquid nitrogen. Here NO*x* referred to the sum of NO and NO2. NO*x* conversion efficiency and N2 selectivity were calculated as follows:

CH3OH conversion efficiency and reaction product yield were calculated as follows:

# **Characterization methods**

The scanning electron microscopy images (SEM) of samples with X-ray energy dispersive spectrometry (EDS) were obtained by a JSM6700F scanning electron microscope. N2 adsorption-desorption analysis was carried out at -196 ºC using a ASAP 2020 PLUS analyzer (Micromeritics), and samples were degassed under vacuum at 350 ºC for 4 h before each test. X-ray diffraction (XRD) was measured using a X'Pert3 Powder (PANalytical) diffractometer with Cu Kα (λ = 0.15406 nm) radiation at the rate of 5 °/min and 2θ range of 5-60 °. H2-TPR was performed in a 10% H2/Ar mixture at a flow rate of 50 mL/min. Typically, samples were pretreated at 350 °C for 1 h in a He stream and then cooled to 50 °C and the temperature was increased from 50 °C to 600 °C at a rate of 10 °C/min. Temperature-programmed desorption of O2 (O2-TPD) was performed using a chemisorber (Autochem II 2920, Micromeritics). The catalyst was chemically adsorbed on O2 at 100 °C for 30 min to reach the adsorption equilibrium, and the sample was heated from 100 °C to 900 °C at a rate of 10 °C/min for O2 desorption. X-ray photoelectron spectroscopy (XPS) was measured on a 250Xi (ThermoFisher Scientific) electron spectrometer with 300 W Al Ka radiation. Temperature-programmed desorption of CO2 (CO2-TPD) was performed using a chemisorber (Autochem II 2920, Micromeritics). The catalyst was pretreated at 350 °C for 1 hour in pure helium gas (50 mL/min), then cooled to 50 °C, and chemically adsorbed on CO2 at 50 °C for 30 min to reach the adsorption equilibrium. Finally, the sample was heated from 50 °C to 800 °C at a rate of 10 °C/min for CO2 desorption. Ultraviolet Visible Diffuse Reflectance Spectroscopy (UV–Vis/DRS) experiments were conducted on a HITACHI U-4100 instrument. In-situ diffuse reflectance infrared Fourier transform spectroscopy (DRIFTS) was recorded using an FTIR spectrometer (Nicolet iS50, ThermoFisher Scientific) equipped with MCT/A detector and cooled by liquid nitrogen. Samples were pretreated in flowing N2 at 300 °C for 30 min before each experiment. Then background spectrum was recorded in N2 flow and would be automatically subtracted from the corresponding spectra. All spectra were measured by accumulating 64 scans with a resolution of 4 cm−1.











Fig. S1. (a) SO2 and (b) H2O resistance test over Cu10/SSZ-13 catalyst at 250 ºC. Reaction conditions: CH3OH = 500 ppm, O2 = 5 vol.%, SO2 = 100 ppm (when used), H2O =5 % (when used), N2 as balance gas, GHSV =60,000 h-1.

Fig. S1(a) shows the CH₃OH conversion of Cu/SSZ-13, Pt-Cu/SSZ-13, Pd-Cu/SSZ-13, Ru-Cu/SSZ-13, and Ag-Cu/SSZ-13 catalysts within the temperature range of 150 - 450 °C (Conversion or yield was unchanged after 250 °C and therefore omitted). The catalytic activity order at low temperatures was determined as Pt-Cu/SSZ-13 > Ru-Cu/SSZ-13 > Pd-Cu/SSZ-13 > Ag-Cu/SSZ-13 > Cu/SSZ-13, indicating that noble metal modification positively enhanced the CH3OH removal performance of the Cu/SSZ-13 catalysts. Among these, Pt-modified Cu/SSZ-13 catalyst demonstrated significantly superior CH3OH removal performance at low temperatures, achieving 90 % CH3OH conversion at 150 °C and complete conversion (100 %) at 200 °C. The catalytic oxidation of methanol was an extremely complex process, accompanied by numerous side reactions that generated various byproducts, such as CO, HCHO, HCOOH, and HCOOCH3. Among these, HCHO and CO emissions posed severe hazards to human health and the ecological environment. Therefore, HCHO and CO, byproducts with potential secondary pollution hazards generated during the CH3OH-SCO reaction, were continuously monitored. Fig. S2(b) and (c) show the HCHO and CO yields of the five catalysts within the temperature range of 150 - 450 °C. The results indicated that all five catalysts generated small amounts of HCHO and CO byproducts at low temperatures. Notably, Pt-Cu/SSZ-13 catalyst produced minimal HCHO and CO throughout the entire temperature range, with maximum yields of 0.6 % and 0 %, respectively. Consequently, Pt-Cu/SSZ-13 catalyst exhibited the optimal catalytic performance for methanol oxidation.





Fig. S2. SO2 resistance test over Cu/SSZ-13 catalyst at 250 ºC. Reaction conditions: CH3OH = 500 ppm, O2 =5 vol.%, SO2 = 100 ppm (when used), N2 as balance gas, GHSV =60,000 h-1.





Fig. S3. SO2 resistance test over Cu/Pt/SSZ-13 catalyst at 250 ºC. Reaction conditions: CH3OH = 500 ppm, O2 =5 vol.%, SO2 = 100 ppm (when used), N2 as balance gas, GHSV =60,000 h-1.

In practical applications, the use of diesel as an ignition fuel typically results in the presence of sulfur dioxide (SO2) in the exhaust gas. In our previous studies (Fig. S2), SO2 caused severe deactivation of Cu/SSZ-13 catalyst. Therefore, the impact of SO2 on the performance of Cu/Pt/SSZ-13 catalyst was investigated at 250 °C. As shown in Fig. S3, upon introducing SO2, the CH3OH conversion of Cu/Pt/SSZ-13 catalyst decreased slightly from 100 % to 99 %, while the CO yield remained virtually unchanged, and the HCHO yield increased from 0 ppm to 8 ppm. During the 5 h exposure to SO2, the CH3OH conversion and CO yield remained stable, whereas the HCHO yield gradually decreased. After terminating the SO2 supply, the CH3OH conversion and CO yield showed no significant variations, and the HCHO yield progressively returned to 0 ppm. These results demonstrate that Pt doping significantly enhanced the sulfur resistance of Cu/SSZ-13 catalyst, with SO2 exhibiting negligible effects on the SCO performance of Cu/Pt/SSZ-13 catalyst.
